# Supplementary material
Source: MDPI journal article supplement (https://www.mdpi.com/2072-4292/10/8/1197)
Supplement: s1 [file s1]

# Quantifying Drought Propagation from Soil Moisture to Vegetation Dynamics Using a Newly Developed Ecohydrological Land Reanalysis

Yohei Sawada

Meteorological Research Institute, Japan Meteorological Agency, Tsukuba, Japan 305-0052; ysawada@mri-jma.go.jp; Tel.: +81-029-853-8552

Received: 23 June 2018; Accepted: 27 July 2018; Published: date

## Supplement Material: Formulations of Coupled Land and Vegetation Data Assimilation System (CLVDAS)

### S1. Land surface model

The LSM of CLVDAS, EcoHydro-SiB solves vertical interlayer flows using the one-dimensional Richards equation. Capillary suction and hydraulic conductivity are calculated by the van Genuchten's water retention model [1]. Transpiration is estimated by the photosynthesis-conductance model of Simple Biosphere model version 2 (SiB2) [2] which simultaneously calculates transpiration and net primary production (carbon assimilation). The other fluxes are also estimated using the parameterizations of SiB2. No groundwater module is included in EcoHydro-SiB.

EcoHydro-SiB can explicitly solve carbon balance. EcoHydro-SiB simulates carbon-pool dynamics by the following equations:

$$\frac{dC_{leaf}}{dt} = a_{leaf}NPP - (d_{leaf} + \gamma + \lambda)C_{leaf} \quad (1)$$

$$\frac{dC_{stem}}{dt} = a_{stem}NPP - d_{stem}C_{stem} \quad (2)$$

$$\frac{dC_{root}}{dt} = a_{root}NPP - d_{root}C_{root} \quad (3)$$

where  $C_{leaf}$ ,  $C_{stem}$ , and  $C_{root}$  are the carbon pools of leaves (photosynthetically active part),

stems (photosynthetically inactive part), and roots, respectively [ $\text{g/m}^2$ ].  $a_{leaf}$ ,  $a_{stem}$ , and

$a_{root}$  are the carbon allocation fractions of leaves, stems, and roots, respectively, and

$a_{leaf} + a_{stem} + a_{root} = 1$ . NPP is the net primary production ( $\text{mol m}^{-2} \text{s}^{-1}$ ) estimated by the SiB2

photosynthesis-conductance model, and  $d_{leaf}$ ,  $d_{stem}$ , and  $d_{root}$  are the normal turnover rates

of leaves, stems, and roots, respectively.  $\gamma$  and  $\lambda$  are the water- and temperature-related

stress factors for leaves, respectively. The carbon allocation fractions are the function of

water-related stress and light availability and are calculated by a parameterization proposed by [3]. The water-related stress factor is calculated from the vertical distribution of soil moisture:

$$\beta_T(i) = \min[1, \max(0, \frac{\theta_i - \theta_w}{\theta_o - \theta_w})], \quad (4)$$

$$\beta_{TOT} = \sum_{i=1}^N \beta_T(i) \times [Y(\Delta z_i \times i) - Y(\Delta z_i \times (i-1))], \quad (5)$$

$$Y(d) = 1 - B^d \quad (6)$$

$$\gamma = \gamma_{\max} (1 - \beta_{TOT})^4, \quad (7)$$

where  $\beta_T(i)$  is the Soil Moisture Index (SMI) of the  $i$ -th soil layer,  $\theta_i$  is the volumetric soil moisture of the  $i$ -th soil layer,  $\theta_w$  is the wilting point, and  $\theta_o$  is the point of stress onset. To obtain  $\theta_w$  and  $\theta_o$ , we specify the corresponding suction pressure values and inversely solve the van Genuchten's water retention model.  $\beta_{TOT}$  is calculated by aggregating the SMI in the soil layers, weighted by the root biomass fraction,  $Y$ , which is estimated using the empirical relationship found by [4] (equation 6).  $N$  is the number of soil layers and  $\Delta z_i$  is the depth of each soil layer.  $Y(d)$  is the cumulative root fraction from the surface to depth  $d$  (cm) and  $B$  is the empirical parameter.  $\gamma_{\max}$  is the maximum stress loss. Since the water-related stress factor affects the carbon pool dynamics, our simulated root-zone soil moisture is strongly related to vegetation dynamics. This parameterization of water-related stress was proposed by [5]. In EcoHydro-SiB, the empirical linear relationship between a carbon pool of leaves and LAI suggested by [6] is used:

$$LAI = SLA \times C_{leaf}, \quad (8)$$

where  $SLA$  is the specific leaf area which indicates leaf thickness ( $\text{m}^2/\text{kg}$ ).

## S2. Radiative transfer model

To directly assimilate brightness temperature observations into a LSM instead of assimilating derived soil moisture and vegetation products, a RTM is needed to convert the land surface condition to microwave brightness temperature. The input data of the RTM are surface soil moisture, surface soil temperature, and LAI, which is calculated by EcoHydro-SiB.

The microwave radiative transfer of a land surface and a vegetation canopy is calculated by the tau-omega model proposed by [7]:

$$T_b^{p,f} = T_{bs}^{p,f} \exp(-\tau_c) + (1 - \omega_c) T_c (1 - \exp(-\tau_c)) + R_{p,f} (1 - \omega_c) T_c (1 - \exp(-\tau_c)) \exp(-\tau_c) \quad (9)$$

where  $T_b^{p,f}$  is the brightness temperature at radiometer level (note that we can neglect atmospheric contribution),  $T_{bs}^{p,f}$  is the brightness temperature at ground level and  $T_{bs}^{p,f} = (1 - R_{p,f}) T_s$ ,  $T_s$  and  $T_c$  are the physical land surface temperature and canopy temperature, respectively,  $\omega_c$  is the single scattering albedo of the canopy,  $R_{p,f}$  is the reflectivity of the land surface, and subscripts  $p$  and  $f$  reveal the polarization (vertical or horizontal), and the frequency, respectively. The first, second, and third terms on the right-hand side of (9) describe the emission from the land surface attenuated by the canopy, the emission from the canopy, and the emission from the canopy reflected by the land surface, respectively. The reflectivity of the land surface is the function of surface soil moisture and calculated by an Advanced Integral Equation Model (AIEM) with the incorporation of a shadowing effect [8].  $\tau_c$  is the vegetation optical depth (VOD), which is calculated using:

$$\tau_c = \frac{b' \lambda_c^x \text{VWC}}{\cos \theta}, \quad (10)$$

where  $b'$  is the vegetation parameter which is independent of wavelength ( $\lambda_c$ ),  $x$  is a parameter which depends on wavelength (in shorter wavelength, microwave is easier to be attenuated by vegetation water) and  $\theta$  is the incident angle. VWC is the vegetation water content. VWC can be directly related to LAI using the function proposed by [9]:

$$\text{VWC} = \exp(\text{LAI} / y) - 1 \quad (11)$$

with the empirical parameter  $y$ . Equations (8-11) relate vegetation dynamics calculated by Ecohydro-SiB to microwave brightness temperature. The RTM has been validated by in-situ observation experiments [8,10,11].

### S3. Data assimilation

The PF is an ensemble data assimilation method. Ensemble data assimilation is a Monte Carlo estimation of Bayes' theorem:

$$p(x_t | y_{1:t}) \propto p(y_t | x_t) p(x_t | y_{1:t-1}) \quad (12)$$

where  $p(x_t | y_{1:t})$  is the probability of the model state  $x$  at time  $t$ , given all observations up to time  $t$ . In the PF, the two factors in the right hand side of (12) are obtained by an ensemble calculation of a numerical model  $f$ :

$$p(x_t | y_{1:t-1}) \approx \frac{1}{N_e} \sum_{i=1}^{N_e} \delta(x_t - f(x_{t-1}^i)) \quad (13)$$

$$p(y_t | x_t) = g(y_t | x_t) \quad (14)$$

where  $N_e$  is the ensemble size,  $x^i$  is the realization of the model state provided by the ensemble member (or particle)  $i$ ,  $\delta()$  is the Dirac delta function. The function  $g$  is the potential function. In this study, the Gaussian distribution of observation errors is assumed and the conditional probability can be estimated as the following equation:

$$g(y_t | x_t) \propto \frac{1}{\sqrt{2\pi\sigma^2}} \exp\left[-\frac{1}{2} \frac{(y_t - h(x_t))^2}{\sigma^2}\right] \quad (15)$$

where  $\sigma$  is an observation error and  $h$  is an observation operator which projects the model state onto the observation space. In CLVDAS, the RTM works as the observation operator. Please note that we show the conditional probability in the case that a single observation is assimilated for brevity. If there are multiple observations to be assimilated, which is the case of this study,  $\sigma$  should be replaced with a variance-covariance error matrix.

In CLVDAS, the sampling-importance-resampling filter (e.g., [12,13,14,15]) is used to do the analysis update of equation (12). This type of PF is widely applied to a LSM and a hydrological model (e.g., [12,16]). First, particles which are far from observations are rejected in the analysis step. We calculate the probability of the selections (survival rate  $P_s(x_t^i)$ ) for each particle. The survival rate of the particle  $i$  is defined as (Remy et al. 2012):

$$P_s(x_t^i) = \frac{g(x_t^i)}{\max_{j \in A} g(x_t^j)} \quad (16)$$

where  $A$  is the set which includes all prior particles. We select survived particles according to their survival rates.

Resampling particles is needed to replace rejected particles. Resampling is applied by copying the surviving particles based on the weights of the particles:

$$w_t^i = \frac{g(x_t^i)}{\sum_{j \in S} g(x_t^j)} \quad (17)$$

where  $w_t^i$  is the weight of the particle  $i$  and  $S$  is the set which includes the surviving particles.

The weights are calculated only for the surviving particles and  $\sum_{i \in S} w_t^i = 1$ . In this resampling

step, the posterior given by (12) is approximated as:

$$p(x_t | y_{1:t}) \approx \sum_{i \in S} w_t^i \delta(x_t - f(x_{t-1}^i)) \quad (18)$$

The surviving particles are resampled according to their weights using multinomial draws until the original number of particles is recovered. After the resampling, we add the fluctuations to soil moisture in all soil layers and LAI of the particles to maintain the diversity of the particles. Perturbing particles contributes to preventing the filter degeneracy, in which all but one particles have extremely small weights. Please note that the resampling step inevitably breaks water balance in the LSM, which is the case of most of conventional data assimilation methods, such as ensemble Kalman filter and variational methods. Uncertainty in model parameters and meteorological forcings is not considered in our PF framework.

In CLVDAS, the model state vector for PF,  $x_t^i$  has soil moisture in all soil layers, biomass pools (including LAI), and temperature. Although satellite microwave remote sensing can observe only surface soil moisture ( $\theta_1$ ) and vegetation dynamics (LAI), we can adjust the unobservable variables in  $x_t^i$  (i.e. subsurface soil moisture) by the PF. Using the correlations between vegetation dynamics and subsurface soil moisture sampled by particles, CLVDAS can improve the skill of EcoHydro-SiB to simulate subsurface soil moisture which is not directly observed by satellites [17].

## References

1. Van Genuchten, M. T. A closed-form equation for predicting the hydraulic conductivity of unsaturated soils, *Soil Sci. Soc. Am. J.* **1980**, *44*, 892–898.
2. Sellers, P. J. et al. A revised land surface parameterization (SiB2) for atmospheric GCMs, Part I: Model formulation, *J. Clim.* **1996**, *9*, 676–705.
3. Friedlingstein, P.; Joel, G.; Field, C. B.; Fung, I. Y. Toward an allocation scheme for global terrestrial carbon models, *Global Change Biology* **1999**, *5*, 755–770.
4. Jackson, R. B. et al. A global analysis of root distributions for terrestrial biomes, *Oecologia* **1996**, *108*, 389–411.
5. Ivanov, V. Y.; Bras, R. L.; Vivoni E. R. Vegetation-hydrology dynamics in complex terrain of semiarid areas: 1. A mechanistic approach to modeling dynamic feedbacks, *Water Resour. Res.* **2008**, *44*, W03429, doi:10.1029/2006WR005588.
6. Calvet, J. et al. An interactive vegetation SVAT model tested against data from six contrasting sites, *Agricultural and Forest Meteorology* **1998**, *92*, 73–95.
7. Mo, T.; Choudhury, B. J.; Schmugge, T. J.; Wang J. R.; Jackson T. J. A Model for Microwave Emission From Vegetation-Covered Fields, *J. Geophys. Res.* **1982**, *87*, 11,229–11,237.
8. Kuria, D., N.; Koike, T.; Lu, H.; Tsutsui, H.; Graf, T. Field-Supported Verification and Improvement of a Passive Microwave Surface Emission Model for Rough, Bare, and Wet Soil Surfaces by Incorporating Shadowing Effects, *IEEE Trans. Geosci. Remote.* **2007**, *45*, 1207–1216.

9. Paloscia, S.; Pampaloni, P. Microwave polarization index for monitoring vegetation growth, *IEEE Trans. Geosci. Remote.* 1988, 26, 617-621, doi: 10.1109/36.7687.
10. Sawada, Y. et al. A Field Verification of an Algorithm for Retrieving Vegetation Water Content from Passive Microwave Observations, *IEEE Trans. Geosci. Remote Sens.* **2016**, 54, 2082-2095, doi:10.1109/TGRS.2015.2495365.
11. Sawada, Y.; Tsutsui, H.; Koike, T. Ground Truth of Passive Microwave Radiative Transfer on Vegetated Land Surfaces., *Remote Sens.* **2017**, 9, 655, [10.3390/rs9070655](https://doi.org/10.3390/rs9070655).
12. Mechri R.; Ottlé, C.; Pannekoucke, O.; Kallel, A. Genetic particle filter application to land surface temperature downscaling, *J. Geophys. Res. Atmos.* **2014**, 119, 2131-2146, doi:10.1002/2013JD020354.
13. Rémy, S.; Pannekoucke, O.; Bergot, T.; Baehr, C. Adaptation of a particle filtering method for data assimilation in a 1D numerical model used for fog forecasting, *Q. J. R. Meteorol. Soc.* **2012**, 138, 536-551.
14. Kwok, N.; Zhou W. Evolutionary particle filter: re-sampling from the genetic algorithm perspective, in *2005 IEEE/RSJ International Conference on Intelligent Robots and Systems* **2005**, pp. 2935–2940, doi:10.1109/IROS.2005.1545119
15. Uosaki, K.; Kimura, Y.; Hatanaka, T.; Evolution strategies based particle filters for state and parameter estimation on nonlinear models, in *Proceedings of the 2004 Congress on Evolutionary Computation (IEEE Cat. No.04TH8753)* **2004**, pp. 884–890, doi:10.1109/CEC.2004.1330954.
16. Vrugt, J., A.; ter Braak, C. J. F.; Diks, C. G. H.; Schoups G. Hydrologic data assimilation using particle Markov chain Monte Carlo simulation: Theory, concepts

and applications, *Advances. in Water Res.* **2013**, *51*, 457-478, doi:

10.1016/j.advwatres.2012.04.002.

17. Sawada, Y.; Koike, T.; Walker, J. P. A land data assimilation system for simultaneous simulation of soil moisture and vegetation dynamics, *J. Geophys. Res. Atmos.* **2015**, *120*, doi:10.1002/2014JD022895.
